# Supplementary material for: Identification of Parameter Importance for Benzene Transport in the Unsaturated Zone Using Global Sensitivity Analysis
Source: Copernicus journal article supplement (doi:10.5194/hess-2023-183), 2023-08-07
Supplement: Supplementary file 1 [file hess-2023-183-supplement.pdf]

# Identification of Parameter Importance for Benzene Transport in the Unsaturated Zone Using Global Sensitivity Analysis

Meirav Cohen<sup>1</sup>, Nimrod Schwartz<sup>2</sup>, and Ravid Rosenzweig<sup>3</sup>

<sup>1</sup> The Dead Sea & Arava Science Center (DSASC), Mitzpe Ramon, Israel

<sup>2</sup> The Institute of Environmental Sciences, The Robert H. Smith Faculty of Agriculture, Food and Environment, The Hebrew University of Jerusalem, Rehovot 76100 , Israel

<sup>3</sup> Geological Survey of Israel, Jerusalem, Israel

This document provides additional information regarding the paper's methodology and results.

### A1. Literature values for first order biodegradation rate constant (day<sup>-1</sup>)

Table S1 – Literature values for benzene first order biodegradation rate constant (day<sup>-1</sup>)

| First order Biodegradation Rate Constant (day <sup>-1</sup> ) | Benzene conc. (mg/l)                                          | Saturation level WC (%)   | Calculation form                | Comments                                 | Reference               |
|---------------------------------------------------------------|---------------------------------------------------------------|---------------------------|---------------------------------|------------------------------------------|-------------------------|
| 174*                                                          | 0.000104                                                      | Unsaturated zone 5-10% WC | Calculated and model-calibrated | Field data - upward flux from NAPL       | Lahvis et al., (1999)   |
| 4.01                                                          | 0.00443                                                       |                           |                                 |                                          |                         |
| 1.48                                                          | 0.0197                                                        |                           |                                 |                                          |                         |
| 0.066                                                         | 0.231                                                         | Capillary zone 12-36% WC  |                                 |                                          |                         |
| 0.31                                                          | 0.231                                                         |                           |                                 |                                          |                         |
| 0.48                                                          | 360-850                                                       | Unsaturated zone 3% WC    | Calculated and model-calibrated | Column experiments upward flux from NAPL | DeVaul et al., (1997)   |
| 0.144                                                         | 1550                                                          | 18% WC                    |                                 |                                          |                         |
| 6.48                                                          |                                                               |                           | Calculated and model-calibrated | Summary of measured data                 |                         |
| 28.8                                                          | ~0.005-2                                                      | Unsaturated               | Calculated and model-calibrated | Field data - upward flux from NAPL       | Hers et al., (2000)     |
| 9.6                                                           |                                                               | Unsaturated               |                                 | Field data                               | Ririe & Sweeney, (1995) |
| 0.035                                                         | 1770                                                          | Unsaturated               | Modeled                         | Lower modeled value                      | Berlin et al., (2016)   |
| 0.05                                                          |                                                               |                           |                                 | Upper modeled value                      |                         |
| <b>0.98</b>                                                   | <b>Overall median value</b>                                   |                           |                                 |                                          |                         |
| <b>0.48</b>                                                   | <b>Overall median value excluding the highest value (174)</b> |                           |                                 |                                          |                         |

## A2. Literature values for benzene sorption coefficient

Table S2 - Literature values of benzene sorption constant

| K <sub>OW</sub><br>Octanol-<br>water<br>partition<br>coefficient<br>(log (m <sup>3</sup> /kg)) | K <sub>OC</sub><br>Organic-<br>carbon<br>partition<br>coefficient<br>(log m <sup>3</sup> /kg) | K <sub>OW</sub><br>Octanol-<br>water<br>partition<br>coefficient<br>(m <sup>3</sup> /kg) | K <sub>OC</sub><br>Organic-<br>carbon<br>partition<br>coefficient<br>(m <sup>3</sup> /kg) | Freundlich sorption<br>coefficients |                                                                           | Fraction<br>organic<br>carbon<br>(f <sub>oc</sub> ) | K <sub>d</sub> Soil<br>Sorption<br>coefficient<br>(m <sup>3</sup> /kg)<br>(K <sub>d</sub> =f <sub>oc</sub> K <sub>OC</sub> ) | Water<br>content | Soil type                                         | Comments                           | Reference                    |
|------------------------------------------------------------------------------------------------|-----------------------------------------------------------------------------------------------|------------------------------------------------------------------------------------------|-------------------------------------------------------------------------------------------|-------------------------------------|---------------------------------------------------------------------------|-----------------------------------------------------|------------------------------------------------------------------------------------------------------------------------------|------------------|---------------------------------------------------|------------------------------------|------------------------------|
|                                                                                                |                                                                                               |                                                                                          |                                                                                           | 1/n <sub>f</sub>                    | K <sub>f</sub> (kg/kg)<br>(kg/m <sup>3</sup> ) <sup>1/n<sub>f</sub></sup> |                                                     |                                                                                                                              |                  |                                                   |                                    |                              |
| -                                                                                              | 1.72E-03                                                                                      | -                                                                                        | 5.25E-02                                                                                  |                                     |                                                                           | 0.05*                                               | <b>2.62E-03</b>                                                                                                              | -                | -                                                 | Calculated<br>from K <sub>OW</sub> | Karickhoff,<br>(1981)        |
| -                                                                                              | 1.82E-03                                                                                      | -                                                                                        | 6.61E-02                                                                                  |                                     |                                                                           | 0.05*                                               | <b>3.30E-03</b>                                                                                                              | -                | -                                                 | Calculated<br>from<br>solubility   |                              |
| 2.11E-03                                                                                       | 1.78E-03                                                                                      | 1.30E-01                                                                                 | 6.00E-02                                                                                  |                                     |                                                                           | 0.05*                                               | <b>3.00E-03</b>                                                                                                              | Saturated        |                                                   | Literature                         |                              |
| -                                                                                              | 1.92E-03                                                                                      |                                                                                          | 8.30E-02                                                                                  |                                     |                                                                           | 0.05*                                               | <b>4.15E-03</b>                                                                                                              | -                | -                                                 | Measured                           | Kenaga, (1980)               |
| -                                                                                              | 1.85E-03                                                                                      |                                                                                          | 7.10E-02                                                                                  |                                     |                                                                           | 0.05*                                               | <b>3.55E-03</b>                                                                                                              | -                | -                                                 | Calculated                         |                              |
|                                                                                                | 2.02E-03                                                                                      |                                                                                          | 1.00                                                                                      |                                     |                                                                           | 0.001-<br>0.004                                     | <b>7E-05</b><br>-<br><b>4.2E-4</b>                                                                                           | Saturated        | Sandy-<br>loam<br>contamin<br>ated with<br>(BTEX) | Measured                           | Mackay et al.,<br>(1996)     |
|                                                                                                | -1.10                                                                                         |                                                                                          | 0.079                                                                                     |                                     |                                                                           | 0.05*                                               | <b>3.95E-03</b>                                                                                                              | -                |                                                   | Literature                         | Wiedemeier et<br>al., (1996) |
|                                                                                                |                                                                                               |                                                                                          |                                                                                           |                                     |                                                                           | 0.05                                                | <b>2.86E-03</b>                                                                                                              | -                | Sandy<br>aquifer<br>materials                     | Measured                           | Baek et al.,<br>(2003)       |
|                                                                                                |                                                                                               |                                                                                          |                                                                                           | 1.11E+00                            | 2.00E-07                                                                  |                                                     |                                                                                                                              | -                | Sand                                              | Measured                           | Du et al., (2010)            |
|                                                                                                |                                                                                               |                                                                                          |                                                                                           | 1.08E+00                            | 2.30E-06                                                                  | 0.03                                                |                                                                                                                              | Unsaturated      | Fine                                              | Batch                              | English & Loehr,             |

|          |  |  |  |          |          |       |                                         |               |            |                    |                         |
|----------|--|--|--|----------|----------|-------|-----------------------------------------|---------------|------------|--------------------|-------------------------|
|          |  |  |  |          |          |       |                                         |               | sandy loam | sorption test      | (1991)                  |
| 5.10E-04 |  |  |  |          |          |       | <b>5.10E-04</b>                         |               | Clay       | Measured           | Osagie & Owabor, (2015) |
|          |  |  |  | 1.11E+00 | 1.11E-03 |       |                                         |               | Sand       | Literature         | Donahue et al., (1999)  |
|          |  |  |  | 9.17E-01 | 4.88E-04 |       |                                         |               |            |                    |                         |
|          |  |  |  |          |          |       | <b>3.33E-04</b><br>-<br><b>3.09E-02</b> | Various clays | Measured   |                    |                         |
|          |  |  |  |          |          |       | <b>2.00E-04</b><br>-<br><b>2.23E-02</b> | Silty clay    |            |                    |                         |
|          |  |  |  |          |          | 0.043 | <b>2.22E-03</b>                         | Clay          | Measured   |                    |                         |
|          |  |  |  |          |          | 0.075 | <b>8.39E-03</b>                         | Clay          |            |                    | Redding et al., (2002)  |
|          |  |  |  |          |          |       | <b>3.70E-05</b><br>-<br><b>4.6E-05</b>  | Clay          | Measured   | Karickhoff, (1981) |                         |

### **A3. Sobol sampling and confidence interval**

Parameter spaces were sampled using the Sobol quasi-random, cross-sampling strategy (Sobol, 2001). Rather than generating random numbers, this technique generates a uniform distribution in the probability space. The distribution appears qualitatively random, but sampling only takes place in regions of the probability function that were not previously sampled.

In order to assess the accuracy of the Sobol indices, confidence intervals of the indices should be constructed. The analytical procedure for confidence interval calculation involves repeating the  $r(2k + 2)$  model runs several times, which is too time consuming and computationally demanding in this case. Therefore the bootstrapping approach was used instead (Efron & Tibshirani, 1986). Archer et al. (1997) suggested using bootstrap confidence intervals to produce confidence intervals of complicated data structures. The bootstrapping approach is based on resampling the parameter space of the already available data many times with replacement (randomly selecting values and allowing for duplicates), and constructing a distribution of the output (Efron & Tibshirani, 1986). Here, resamples were taken from the existing dataset  $Y$  with replacement, and the indices' values were recalculated. That gives an estimate of the mean and variance of each of the indices and allows calculation of the confidence interval. The method thus relies on computational cost rather than on an analytical cost (running the model again). Here, the samples used for the model evaluation were resampled 1000 times with replacement, and 95% confidence intervals were constructed (Archer et al., 1997).

Still, confidence intervals for the first-order indices ( $S_1$ ), with the Sobol sampling method gave values of more than 100%. This was also observed by Brunetti et al. (2016) and Hartmann et al. (2018) who also studied transport in unsaturated media. This may be a result of insufficient sample size, since Sobol's convergence requires a very large sample size (Saltelli et al., 2004). Therefore, here the  $S_1$  values were extracted using the delta method of Plischke et al. (2013), calculating  $S_1$  values from a given data through emulators and bootstrapping rather than running the model itself multiple times.

### **A4. The RBF approximation equations:**

The RBF approximation is a weighted summation of  $n_a$  basis functions (and a polynomial or constant value) that can approximate the predictive response  $Y(x)$  at a point  $x_i$  as follows:

1. 
$$Y(x) = \sum_{i=1}^{n_a} \omega_i f(\|x - x_i\|) = f(x)\omega$$

where  $f = \{f_1, f_2, \dots, f_{n_a}\}$  is the vector of the basis functions,  $\omega_i$  is the  $i^{\text{th}}$  component of the radial basis coefficient vector  $\boldsymbol{\omega} = \{\omega_1, \omega_2, \dots, \omega_{n_a}\}^T$  and  $\|\mathbf{x} - \mathbf{x}_i\|$  is the Euclidian distance between two sample points.

There are various forms of basis functions; the most popular is the Gaussian kernel function:

$$2. \quad f(\|\mathbf{x} - \mathbf{x}_i\|) = \exp\left(-\frac{\|\mathbf{x} - \mathbf{x}_i\|^2}{\varepsilon^2}\right)$$

where  $\varepsilon$  is the shape parameter which determines the spread of the kernel function  $f_i$ . The coefficient vector  $\boldsymbol{\omega}$  can be obtained by enforcing the accurate interpolation condition, i.e.,

$$3. \quad \begin{bmatrix} y(\mathbf{x}_1) \\ y(\mathbf{x}_2) \\ \vdots \\ y(\mathbf{x}_{n_a}) \end{bmatrix} = \begin{bmatrix} f(x_{11}) & f(x_{12}) & \dots & f(x_{1n_a}) \\ f(x_{21}) & f(x_{22}) & \dots & f(x_{2n_a}) \\ \vdots & \vdots & \ddots & \vdots \\ f(x_{n_a1}) & f(x_{n_a2}) & \dots & f(x_{n_a n_a}) \end{bmatrix}$$

where  $f_{uv} = f(\|\mathbf{x}_u - \mathbf{x}_v\|)$ . In a matrix form, Equation 3 can be rewritten as  $\mathbf{Y}_a = \mathbf{F}\boldsymbol{\omega}$ . This equation has a unique solution  $\boldsymbol{\omega} = \mathbf{F}^{-1}\mathbf{Y}_a$  if and only if all the sample points are different from each other. Therefore, the filled values for the remaining  $n_m$  locations, for which the model responses are missing due to simulation crashes, can be approximated by Equation 4:

$$4. \quad Y(\mathbf{x}_i) = f(\mathbf{x}_i)\mathbf{F}^{-1}\mathbf{Y}_a \quad (i = 1, 2, \dots, n_a)$$

In this study  $n_a$  was set to the number of non-missing sample points. The shape parameter  $\varepsilon$  was changed from the default of the mean distance between neighboring nodes, to the average KNN of the response function, where  $k$  was set to five.

#### **A5. Morris homogenous sandy soil results:**

Tables S3 and S4 present  $\mu^*$ ,  $\mu^*$  confidence interval and  $\sigma$  results of the Morris analysis in homogeneous media for the flux and concentration respectively, with different methods for missing data handling.

Table S3: Morris indices values of total benzene flux to the aquifer, indicating the different methods for missing parameter handling

| Method                    | Output value                      | Input parameter |        |       |            |       |             |        |
|---------------------------|-----------------------------------|-----------------|--------|-------|------------|-------|-------------|--------|
|                           |                                   | $\alpha$        | n      | $K_s$ | $\alpha_i$ | $k_d$ | $\lambda_k$ | z      |
| Zero replaced             | $\mu^*$                           | 1.001           | 3.080  | 0.444 | 0.043      | 1.941 | 6.791       | 4.461  |
|                           | $\mu^*$ confidence interval       | 0.756           | 1.160  | 0.181 | 0.017      | 0.812 | 2.000       | 1.679  |
|                           | $\sigma$                          | 5.675           | 10.343 | 1.595 | 0.143      | 6.253 | 16.472      | 13.494 |
| 5NN                       | $\mu^*$                           | 1.271           | 3.379  | 0.614 | 0.077      | 1.941 | 6.791       | 4.638  |
|                           | $\mu^*$ confidence interval       | 0.734           | 1.498  | 0.317 | 0.054      | 0.811 | 1.908       | 1.663  |
|                           | $\sigma$                          | 6.480           | 10.706 | 2.629 | 0.459      | 6.253 | 16.472      | 13.512 |
| 45NN                      | $\mu^*$                           | 1.161           | 3.399  | 0.587 | 0.057      | 1.941 | 6.793       | 4.737  |
|                           | $\mu^*$ confidence interval       | 0.697           | 1.406  | 0.271 | 0.026      | 0.658 | 1.882       | 1.946  |
|                           | $\sigma$                          | 5.843           | 10.445 | 2.056 | 0.193      | 6.253 | 16.472      | 13.531 |
| RBF                       | $\mu^*$                           | 1.288           | 4.269  | 0.787 | 0.153      | 1.973 | 6.850       | 5.305  |
|                           | $\mu^*$ confidence interval       | 0.727           | 1.502  | 0.416 | 0.152      | 0.723 | 1.998       | 1.944  |
|                           | $\sigma$                          | 6.052           | 13.149 | 3.564 | 1.237      | 6.249 | 16.458      | 15.322 |
| Full trajectories removed | $\mu^*$                           | 0.713           | 3.069  | 0.451 | 0.045      | 1.913 | 6.544       | 4.331  |
|                           | $\mu^*$ confidence interval       | 0.546           | 1.440  | 0.170 | 0.021      | 0.787 | 2.258       | 1.726  |
|                           | $\sigma$                          | 4.292           | 10.492 | 1.614 | 0.148      | 6.167 | 16.027      | 12.787 |
| Average                   | $\mu^*$                           | 1.087           | 3.439  | 0.576 | 0.075      | 1.941 | 6.754       | 4.694  |
|                           | $\mu^*$ STDEV                     | 0.238           | 0.490  | 0.141 | 0.046      | 0.021 | 0.120       | 0.376  |
|                           | $\mu^*$ confidence interval       | 0.692           | 1.401  | 0.271 | 0.054      | 0.758 | 2.009       | 1.792  |
|                           | $\mu^*$ confidence interval STDEV | 0.084           | 0.141  | 0.102 | 0.057      | 0.067 | 0.149       | 0.142  |
|                           | $\sigma$                          | 5.668           | 11.027 | 2.292 | 0.436      | 6.235 | 16.380      | 13.729 |
|                           | $\sigma$ STDEV                    | 0.826           | 1.194  | 0.827 | 0.466      | 0.038 | 0.198       | 0.944  |

Table S4: Morris indices values of final concentration of benzene in aquifer, indicating the different methods for missing parameter handling

| Method                    | Output value                      | Input parameter |        |        |            |        |             |        |
|---------------------------|-----------------------------------|-----------------|--------|--------|------------|--------|-------------|--------|
|                           |                                   | $\alpha$        | n      | $K_s$  | $\alpha_l$ | $k_d$  | $\Lambda_k$ | Z      |
| Zero replaced             | $\mu^*$                           | 0.0169          | 0.0894 | 0.0286 | 0.0040     | 0.1516 | 0.5540      | 0.2188 |
|                           | $\mu^*$ confidence interval       | 0.0230          | 0.0413 | 0.0142 | 0.0025     | 0.0643 | 0.1273      | 0.0755 |
|                           | $\sigma$                          | 0.1886          | 0.3897 | 0.1172 | 0.0217     | 0.4891 | 1.0351      | 0.6164 |
| 5NN                       | $\mu^*$                           | 0.0294          | 0.1004 | 0.0356 | 0.0060     | 0.1516 | 0.5540      | 0.2290 |
|                           | $\mu^*$ confidence interval       | 0.0258          | 0.0454 | 0.0168 | 0.0046     | 0.0635 | 0.1339      | 0.0740 |
|                           | $\sigma$                          | 0.2295          | 0.3880 | 0.1446 | 0.0314     | 0.4891 | 1.0351      | 0.6188 |
| 45NN                      | $\mu^*$                           | 0.0258          | 0.1049 | 0.0356 | 0.0048     | 0.1516 | 0.5542      | 0.2337 |
|                           | $\mu^*$ confidence interval       | 0.0242          | 0.0511 | 0.0148 | 0.0028     | 0.0631 | 0.1274      | 0.0728 |
|                           | $\sigma$                          | 0.1972          | 0.3846 | 0.1311 | 0.0230     | 0.4891 | 1.0350      | 0.6185 |
| RBF                       | $\mu^*$                           | 0.0189          | 0.1046 | 0.0306 | 0.0076     | 0.1545 | 0.5575      | 0.2536 |
|                           | $\mu^*$ confidence interval       | 0.0207          | 0.0606 | 0.0135 | 0.0054     | 0.0672 | 0.1270      | 0.0835 |
|                           | $\sigma$                          | 0.1972          | 0.3846 | 0.1311 | 0.0230     | 0.4891 | 1.0350      | 0.6185 |
| Full trajectories removed | $\mu^*$                           | 0.0046          | 0.0865 | 0.0300 | 0.0041     | 0.1511 | 0.5416      | 0.2195 |
|                           | $\mu^*$ confidence interval       | 0.0030          | 0.0465 | 0.0184 | 0.0031     | 0.0636 | 0.1198      | 0.0789 |
|                           | $\sigma$                          | 0.0241          | 0.3702 | 0.1216 | 0.0225     | 0.4892 | 1.0207      | 0.6095 |
| Average                   | $\mu^*$                           | 0.019           | 0.097  | 0.032  | 0.005      | 0.152  | 0.552       | 0.231  |
|                           | $\mu^*$ STDEV                     | 0.010           | 0.009  | 0.003  | 0.002      | 0.001  | 0.006       | 0.014  |
|                           | $\mu^*$ confidence interval       | 0.019           | 0.049  | 0.016  | 0.004      | 0.064  | 0.127       | 0.077  |
|                           | $\mu^*$ confidence interval STDEV | 0.009           | 0.007  | 0.002  | 0.001      | 0.002  | 0.005       | 0.004  |
|                           | $\sigma$                          | 0.167           | 0.383  | 0.129  | 0.024      | 0.489  | 1.032       | 0.616  |
|                           | $\sigma$ STDEV                    | 0.082           | 0.008  | 0.011  | 0.004      | 0.000  | 0.006       | 0.004  |



### A6. Sobol homogenous sandy soil results:

Tables S5 and S6 present first order results of Sobol indices values determined by the Sobol analysis in homogeneous media for benzene total flux and final concentration in the aquifer, respectively, with the different methods for missing data imputation.

Table S5: First order Sobol indices values for benzene total flux to the aquifer with the different methods for missing parameter handling:

| Method        | Output value                    | Input parameter |         |             |         |
|---------------|---------------------------------|-----------------|---------|-------------|---------|
|               |                                 | n               | $k_d$   | $\lambda_k$ | z       |
| Zero replaced | $S_1$                           | 0.003           | 0.001   | 0.107       | 0.019   |
|               | $S_1$ confidence interval       | 0.001           | 0.001   | 0.014       | 0.005   |
| 5 KNN         | $S_1$                           | 0.003           | 0.001   | 0.111       | 0.021   |
|               | $S_1$ confidence interval       | 0.001           | 0.001   | 0.015       | 0.005   |
| 233 KNN       | $S_1$                           | 0.003           | 0.001   | 0.109       | 0.022   |
|               | $S_1$ confidence interval       | 0.001           | 0.001   | 0.013       | 0.005   |
| RBF           | $S_1$                           | 0.002           | 0.001   | 0.135       | 0.012   |
|               | $S_1$ confidence interval       | 0.001           | 0.001   | 0.017       | 0.003   |
| Average       | $S_1$                           | 0.003           | 0.001   | 0.115       | 0.018   |
|               | STDEV $S_1$                     | 0.00049         | 0.00012 | 0.01307     | 0.00453 |
|               | $S_1$ confidence interval       | 0.001           | 0.001   | 0.015       | 0.005   |
|               | STDEV $S_1$ confidence interval | 0.00022         | 0.00006 | 0.00173     | 0.00130 |

Table S6: First order Sobol indices values for final concentration of benzene in the aquifer with the different methods for missing parameter handling:

| Method        | Output value              | Input parameter |         |             |         |
|---------------|---------------------------|-----------------|---------|-------------|---------|
|               |                           | n               | $k_d$   | $\lambda_k$ | z       |
| Zero replaced | $S_1$                     | 0.002           | 0.001   | 0.130       | 0.011   |
|               | $S_1$ confidence interval | 0.001           | 0.001   | 0.014       | 0.003   |
| 5 KNN         | $S_1$                     | 0.002           | 0.001   | 0.133       | 0.012   |
|               | $S_1$ confidence interval | 0.001           | 0.001   | 0.014       | 0.003   |
| 233 KNN       | $S_1$                     | 0.002           | 0.001   | 0.131       | 0.012   |
|               | $S_1$ confidence interval | 0.001           | 0.001   | 0.013       | 0.003   |
| RBF           | $S_1$                     | 0.002           | 0.001   | 0.135       | 0.012   |
|               | $S_1$ confidence interval | 0.001           | 0.001   | 0.017       | 0.003   |
| Average       | $S_1$                     | 0.002           | 0.001   | 0.132       | 0.012   |
|               | STDEV $S_1$               | 0.00009         | 0.00006 | 0.00233     | 0.00057 |

|  |                                 |         |         |         |         |
|--|---------------------------------|---------|---------|---------|---------|
|  | $S_1$ confidence interval       | 0.001   | 0.001   | 0.015   | 0.003   |
|  | STDEV $S_1$ confidence interval | 0.00009 | 0.00005 | 0.00147 | 0.00016 |

Tables S7 and S8 present total Sobol indices values of the Sobol analysis in homogeneous media for benzene total flux and final concentration in the aquifer respectively, with the different methods for missing data imputation.

Table S7: Total Sobol indices values for benzene total flux to the aquifer with the different methods for missing parameter handling:

| Method        | Output value                    | Input parameter |         |             |         |
|---------------|---------------------------------|-----------------|---------|-------------|---------|
|               |                                 | n               | $k_d$   | $\lambda_k$ | z       |
| Zero replaced | $S_T$                           | 0.226           | 0.107   | 1.046       | 0.781   |
|               | $S_T$ confidence interval       | 0.160           | 0.095   | 0.463       | 0.421   |
| 5 KNN         | $S_T$                           | 0.215           | 0.105   | 1.047       | 0.785   |
|               | $S_T$ confidence interval       | 0.208           | 0.104   | 0.588       | 0.409   |
| 233 KNN       | $S_T$                           | 0.219           | 0.106   | 1.045       | 0.782   |
|               | $S_T$ confidence interval       | 0.178           | 0.107   | 0.599       | 0.450   |
| RBF           | $S_T$                           | 0.225           | 0.105   | 1.046       | 0.776   |
|               | $S_T$ confidence interval       | 0.189           | 0.114   | 0.573       | 0.459   |
| Average       | $S_T$                           | 0.221           | 0.106   | 1.046       | 0.781   |
|               | STDEV $S_T$                     | 0.00534         | 0.00065 | 0.00095     | 0.00360 |
|               | ST confidence interval          | 0.184           | 0.105   | 0.556       | 0.435   |
|               | STDEV $S_T$ confidence interval | 0.02029         | 0.00788 | 0.06268     | 0.02372 |

Table S8: Total Sobol indices values for benzene final concentration in the aquifer with the different methods for missing parameter handling:

| Method        | Output value              | Input parameter |       |             |       |
|---------------|---------------------------|-----------------|-------|-------------|-------|
|               |                           | n               | $k_d$ | $\lambda_k$ | z     |
| Zero replaced | $S_T$                     | 0.173           | 0.087 | 1.204       | 0.583 |
|               | $S_T$ confidence interval | 0.121           | 0.084 | 0.585       | 0.346 |
| 5 KNN         | $S_T$                     | 0.164           | 0.086 | 1.202       | 0.588 |
|               | $S_T$ confidence interval | 0.136           | 0.087 | 0.635       | 0.355 |
| 233 KNN       | $S_T$                     | 0.168           | 0.087 | 1.203       | 0.583 |
|               | $S_T$ confidence interval | 0.101           | 0.075 | 0.499       | 0.304 |
| RBF           | $S_T$                     | 0.164           | 0.086 | 1.200       | 0.581 |
|               | $S_T$ confidence interval | 0.110           | 0.091 | 0.489       | 0.312 |
| Average       | $S_T$                     | 0.167           | 0.087 | 1.202       | 0.584 |

|  |                                 |         |         |         |         |
|--|---------------------------------|---------|---------|---------|---------|
|  | STDEV $S_T$                     | 0.00415 | 0.00055 | 0.00162 | 0.00301 |
|  | ST confidence interval          | 0.117   | 0.084   | 0.552   | 0.329   |
|  | STDEV $S_T$ confidence interval | 0.01500 | 0.00672 | 0.07055 | 0.02498 |

**A7. Morris analysis for heterogeneous media**  
**a. Clay layer characterization**

Table S9 presents overall hydraulic conductivities and soil types of the different soil categories used for characterization of field site clay layers and Table S10 presents an example from one such site.

Table S9: Soil type characterization according to hydraulic conductivities values:

| Category           | Name             | Soil type           | K (m/day) | Source                                 |
|--------------------|------------------|---------------------|-----------|----------------------------------------|
| <b>Gravel</b>      | gravel           | gravel              | 8640      | Bear (1972)                            |
|                    | gravel sand      | sandy gravel        |           |                                        |
| <b>Sand</b>        | sand             | sand                | 7.128     | Carsel & Parrish (1988)                |
|                    | sand gravel      | gravely sand        | 7.128     |                                        |
|                    | kurkar sand      |                     | 7.128     |                                        |
|                    | filling sub      |                     | 7.128     |                                        |
|                    | sand silt        | silty sand          | 3.502     | Carsel & Parrish (1988)                |
|                    | silt sand        | sandy silt          | 1.061     | Carsel & Parrish (1988)                |
| <b>Clayey Sand</b> | sand clay        | clayey sand         | 0.1888    | Rosetta assuming 55% sand and 45% clay |
|                    | sand with clay   |                     | 0.1888    |                                        |
|                    | sand clay gravel | clayey gravely sand | 0.1888    |                                        |
| <b>Clay</b>        | silt             | silt                | 0.06      | Carsel & Parrish (1988)                |
|                    | clay             | clay                | 0.048     | Carsel & Parrish (1988)                |
|                    | limestone        | limestone           | 8.64E-06  | Bear (1972)                            |
|                    | clay sand        | sandy clay          | 0.0288    | Carsel & Parrish (1988)                |
|                    | clay silt        | silty clay          | 0.0048    | Carsel & Parrish (1988)                |
|                    | gravel sand clay | gravely sandy clay  | 0.0288    |                                        |

Table S10: Example of clay layers data extraction from one site

| Data received  |              |                       |                              |          |                     | Data extrapolated |          |                       |                                  |
|----------------|--------------|-----------------------|------------------------------|----------|---------------------|-------------------|----------|-----------------------|----------------------------------|
| From depth (m) | To depth (m) | Sand /sand-gravel (%) | Sand clay/ clayey sand (%)** | Clay (%) | Number of boreholes | Sand (%)          | Clay (%) | Thickness of clay (m) | Overall clay layer thickness (m) |
| 1              | 3            | 33%                   | 0%                           | 67%      | 3                   | 33.3%             | 67%      | 2                     | 3.5                              |
|                | 4            | 0%                    | 50%                          | 50%      | 3                   | 27.5%             | 73%      | 1                     |                                  |
|                | 5            | 25%                   | 50%                          | 25%      | 2                   | 52.5%             | 48%      | 0.5                   |                                  |
|                | 5.5          | 100%                  | 0%                           | 0%       | 4                   | 100.0%            | 0%       | 1                     |                                  |
|                | 6.5          | 0%                    | 0%                           | 100%     | 2                   | 0.0%              | 100%     | 0.5                   | 4                                |
|                | 7            | 0%                    | 0%                           | 100%     | 2                   | 0.0%              | 100%     | 2                     |                                  |
|                | 9            | 0%                    | 67%                          | 33%      | 1                   | 0.0%              | 100%     | 1                     |                                  |
|                | 10           | 0%                    | 0%                           | 100%     | 2                   | 36.7%             | 63%      | 0.5                   |                                  |
| 10.5           | 11           | 100%                  | 0%                           | 0%       | 1                   | 100.0%            | 0%       | 0.5                   |                                  |
|                | 11.5         | 0%                    | 100%                         | 0%       | 1                   | 55.0%             | 45%      | 0.5                   | 1                                |
|                | 12           | 50%                   | 0%                           | 50%      | 3                   | 50.0%             | 50%      | 0.5                   |                                  |
|                | 12.5         | 100%                  | 0%                           | 0%       | 1                   | 100.0%            | 0%       |                       |                                  |

\*Other sites also contained other soil types \*\*Sand clay and clayey sand soil were classified as 55% sand and 45% clay (Table S10) according to Rosetta (Schaap et al., 2001).

## b. Morris analysis results

Tables S11 and S12 present  $\mu^*$ ,  $\mu^*$  confidence interval and  $\sigma$  results of the Morris analysis in heterogeneous media for benzene total flux to the aquifer and final concentration in the aquifer respectively, with the different methods for missing data handling.

Table S11: Morris indices values of benzene flux to the aquifer for heterogeneous media received with the different methods for missing parameter handling

| Method        | Output value                | Input parameter |       |          |            |       |          |               |               |          |                |          |                |       |       |       |
|---------------|-----------------------------|-----------------|-------|----------|------------|-------|----------|---------------|---------------|----------|----------------|----------|----------------|-------|-------|-------|
|               |                             | $\alpha_1$      | $n_1$ | $K_{s1}$ | $\alpha_2$ | $n_2$ | $K_{s2}$ | $\alpha_{l1}$ | $\alpha_{l2}$ | $k_{d1}$ | $\lambda_{k1}$ | $k_{d2}$ | $\lambda_{k2}$ | $z$   | $N$   | $b$   |
| Zero replaced | $\mu^*$                     | 0.105           | 0.000 | 0.560    | 0.009      | 0.259 | 0.022    | 0.022         | 0.094         | 0.210    | 0.437          | 0.820    | 0.520          | 0.170 | 0.326 | 0.266 |
|               | $\mu^*$ confidence interval | 0.091           | 0.000 | 0.418    | 0.011      | 0.219 | 0.037    | 0.026         | 0.110         | 0.182    | 0.401          | 0.745    | 0.449          | 0.162 | 0.269 | 0.341 |
|               | $\sigma$                    | 0.741           | 3.942 | 1.728    | 0.001      | 0.101 | 0.321    | 0.208         | 0.842         | 1.551    | 6.008          | 3.779    | 3.944          | 1.305 | 2.590 | 2.516 |
| 5NN           | $\mu^*$                     | 0.149           | 0.001 | 0.550    | 0.009      | 0.355 | 0.009    | 0.022         | 0.216         | 0.210    | 0.437          | 0.821    | 0.520          | 0.172 | 0.338 | 0.226 |
|               | $\mu^*$ confidence interval | 0.104           | 0.002 | 0.464    | 0.011      | 0.254 | 0.014    | 0.023         | 0.219         | 0.194    | 0.433          | 0.734    | 0.503          | 0.158 | 0.343 | 0.245 |
|               | $\sigma$                    | 0.855           | 0.017 | 3.923    | 0.102      | 2.021 | 0.108    | 0.208         | 1.637         | 1.551    | 3.779          | 6.008    | 3.944          | 1.305 | 2.599 | 2.078 |
| 63NN          | $\mu^*$                     | 0.131           | 0.009 | 0.576    | 0.022      | 0.305 | 0.030    | 0.028         | 0.121         | 0.210    | 0.437          | 0.828    | 0.521          | 0.211 | 0.347 | 0.272 |
|               | $\mu^*$ confidence interval | 0.085           | 0.010 | 0.575    | 0.020      | 0.232 | 0.033    | 0.023         | 0.102         | 0.207    | 0.516          | 0.746    | 0.500          | 0.167 | 0.328 | 0.325 |
|               | $\sigma$                    | 0.750           | 3.928 | 1.755    | 0.067      | 0.151 | 0.264    | 0.214         | 0.856         | 1.551    | 6.008          | 3.779    | 3.944          | 1.322 | 2.595 | 2.430 |
| RBF           | $\mu^*$                     | 0.247           | 0.059 | 0.688    | 0.030      | 0.486 | 0.007    | 0.060         | 0.280         | 0.221    | 0.481          | 0.863    | 0.559          | 0.331 | 0.408 | 0.225 |
|               | $\mu^*$ confidence interval | 0.117           | 0.036 | 0.554    | 0.018      | 0.323 | 0.004    | 0.039         | 0.121         | 0.181    | 0.439          | 0.705    | 0.472          | 0.193 | 0.336 | 0.221 |
|               | $\sigma$                    | 1.101           | 0.295 | 3.987    | 0.151      | 2.397 | 0.031    | 0.317         | 1.370         | 1.555    | 3.791          | 6.011    | 3.947          | 1.586 | 2.647 | 1.702 |
| Full          | $\mu^*$                     | 0.152           | 0.000 | 0.822    | 0.013      | 0.213 | 0.003    | 0.031         | 0.118         | 0.308    | 0.649          | 0.588    | 0.709          | 0.261 | 0.282 | 0.165 |

|                      |                                  |       |       |       |       |       |       |       |       |       |       |       |       |       |       |       |
|----------------------|----------------------------------|-------|-------|-------|-------|-------|-------|-------|-------|-------|-------|-------|-------|-------|-------|-------|
| trajectories removed | $\mu^*$ confidence interval      | 0.147 | 0.000 | 0.676 | 0.018 | 0.188 | 0.005 | 0.043 | 0.170 | 0.301 | 0.645 | 0.699 | 0.857 | 0.231 | 0.341 | 0.308 |
|                      | $\sigma$                         | 0.911 | 4.864 | 1.463 | 0.000 | 0.126 | 0.026 | 0.258 | 1.005 | 1.915 | 4.915 | 4.693 | 4.854 | 1.621 | 2.295 | 1.797 |
| Average              | $\mu^*$                          | 0.157 | 0.014 | 0.639 | 0.017 | 0.323 | 0.014 | 0.032 | 0.166 | 0.232 | 0.488 | 0.784 | 0.566 | 0.229 | 0.340 | 0.231 |
|                      | $\mu^*$ STDE                     | 0.054 | 0.025 | 0.116 | 0.009 | 0.105 | 0.011 | 0.016 | 0.079 | 0.043 | 0.092 | 0.111 | 0.082 | 0.068 | 0.046 | 0.043 |
|                      | $\mu^*$ confidence interval      | 0.109 | 0.010 | 0.537 | 0.015 | 0.243 | 0.018 | 0.031 | 0.144 | 0.213 | 0.487 | 0.726 | 0.556 | 0.182 | 0.323 | 0.288 |
|                      | $\mu^*$ confidence interval STDE | 0.025 | 0.015 | 0.101 | 0.004 | 0.051 | 0.016 | 0.009 | 0.049 | 0.050 | 0.098 | 0.022 | 0.170 | 0.031 | 0.031 | 0.052 |
|                      | $\sigma$                         | 0.872 | 2.609 | 2.571 | 0.064 | 0.959 | 0.150 | 0.241 | 1.142 | 1.624 | 4.900 | 4.854 | 4.127 | 1.428 | 2.545 | 2.105 |
|                      | $\sigma$ STDE                    | 0.147 | 2.273 | 1.269 | 0.065 | 1.149 | 0.136 | 0.047 | 0.349 | 0.163 | 1.111 | 1.119 | 0.407 | 0.161 | 0.142 | 0.365 |

Table S12: Morris indices values for benzene final concentration in the aquifer in heterogeneous media received with the different methods for missing parameter handling

| Method        | Output value                | Input parameter |        |          |            |        |          |               |               |          |                |          |                |        |        |        |
|---------------|-----------------------------|-----------------|--------|----------|------------|--------|----------|---------------|---------------|----------|----------------|----------|----------------|--------|--------|--------|
|               |                             | $\alpha_1$      | $n_1$  | $K_{s1}$ | $\alpha_2$ | $n_2$  | $K_{s2}$ | $\alpha_{i1}$ | $\alpha_{i2}$ | $k_{d1}$ | $\lambda_{k1}$ | $k_{d2}$ | $\lambda_{k2}$ | $z$    | $N$    | $b$    |
| Zero replaced | $\mu^*$                     | 0.0014          | 0.0000 | 0.0331   | 0.0006     | 0.0131 | 0.0033   | 0.0042        | 0.0095        | 0.0243   | 0.0295         | 0.0580   | 0.0428         | 0.0186 | 0.0185 | 0.0221 |
|               | $\mu^*$ confidence interval | 0.0013          | 0.0000 | 0.0244   | 0.0008     | 0.0137 | 0.0067   | 0.0069        | 0.0093        | 0.0192   | 0.0298         | 0.0485   | 0.0283         | 0.0171 | 0.0171 | 0.0237 |
|               | $\sigma$                    | 0.0112          | 0.2071 | 0.0921   | 0.0002     | 0.0058 | 0.0518   | 0.0536        | 0.0749        | 0.1630   | 0.3312         | 0.2145   | 0.2603         | 0.1442 | 0.1296 | 0.2004 |
| 5NN           | $\mu^*$                     | 0.0067          | 0.0002 | 0.0331   | 0.0006     | 0.0200 | 0.0013   | 0.0042        | 0.0157        | 0.0243   | 0.0295         | 0.0580   | 0.0428         | 0.0198 | 0.0195 | 0.0188 |
|               | $\mu^*$ confidence interval | 0.0054          | 0.0004 | 0.0248   | 0.0008     | 0.0151 | 0.0020   | 0.0062        | 0.0127        | 0.0193   | 0.0257         | 0.0429   | 0.0329         | 0.0187 | 0.0167 | 0.0197 |
|               | $\sigma$                    | 0.0416          | 0.0032 | 0.2058   | 0.0058     | 0.1169 | 0.0168   | 0.0536        | 0.0978        | 0.1630   | 0.2145         | 0.3312   | 0.2603         | 0.1449 | 0.1307 | 0.1681 |
| 63NN          | $\mu^*$                     | 0.0042          | 0.0007 | 0.0352   | 0.0019     | 0.0169 | 0.0037   | 0.0046        | 0.0113        | 0.0243   | 0.0295         | 0.0585   | 0.0429         | 0.0221 | 0.0203 | 0.0226 |
|               | $\mu^*$ confidence interval | 0.0021          | 0.0005 | 0.0241   | 0.0013     | 0.0102 | 0.0049   | 0.0073        | 0.0086        | 0.0213   | 0.0261         | 0.0395   | 0.0361         | 0.0188 | 0.0165 | 0.0243 |
|               | $\sigma$                    | 0.0157          | 0.2063 | 0.0959   | 0.0043     | 0.0112 | 0.0406   | 0.0537        | 0.0756        | 0.1630   | 0.3312         | 0.2145   | 0.2603         | 0.1449 | 0.1303 | 0.1940 |
| RBF           | $\mu^*$                     | 0.0146          | 0.0005 | 0.0400   | 0.0024     | 0.0285 | 0.0004   | 0.0071        | 0.0198        | 0.0254   | 0.0324         | 0.0610   | 0.0465         | 0.0331 | 0.0249 | 0.0190 |
|               | $\mu^*$ confidence interval | 0.0083          | 0.0026 | 0.0241   | 0.0011     | 0.0154 | 0.0002   | 0.0055        | 0.0110        | 0.0185   | 0.0254         | 0.0403   | 0.0295         | 0.0191 | 0.0143 | 0.0162 |
|               | $\sigma$                    | 0.0706          | 0.0249 | 0.2080   | 0.0105     | 0.1312 | 0.0017   | 0.0559        | 0.0912        | 0.1632   | 0.2152         | 0.3313   | 0.2608         | 0.1611 | 0.1361 | 0.1410 |

|                           |                                  |        |        |        |        |        |        |        |        |        |        |        |        |        |        |        |
|---------------------------|----------------------------------|--------|--------|--------|--------|--------|--------|--------|--------|--------|--------|--------|--------|--------|--------|--------|
| Full trajectories removed | $\mu^*$                          | 0.0014 | 0.0000 | 0.0471 | 0.0008 | 0.0132 | 0.0001 | 0.0062 | 0.0107 | 0.0365 | 0.0399 | 0.0479 | 0.0524 | 0.0281 | 0.0173 | 0.0156 |
|                           | $\mu^*$ confidence interval      | 0.0012 | 0.0000 | 0.0335 | 0.0001 | 0.0141 | 0.0001 | 0.0113 | 0.0147 | 0.0313 | 0.0402 | 0.0477 | 0.0465 | 0.0284 | 0.0208 | 0.0223 |
|                           | $\sigma$                         | 0.0093 | 0.2536 | 0.0872 | 0.0000 | 0.0072 | 0.0008 | 0.0668 | 0.0852 | 0.2016 | 0.2927 | 0.2616 | 0.3085 | 0.1790 | 0.1359 | 0.1559 |
| Average                   | $\mu^*$                          | 0.006  | 0.001  | 0.038  | 0.001  | 0.018  | 0.002  | 0.005  | 0.013  | 0.027  | 0.032  | 0.057  | 0.046  | 0.024  | 0.020  | 0.020  |
|                           | $\mu^*$ STDE                     | 0.005  | 0.002  | 0.006  | 0.001  | 0.006  | 0.002  | 0.001  | 0.004  | 0.005  | 0.004  | 0.005  | 0.004  | 0.006  | 0.003  | 0.003  |
|                           | $\mu^*$ confidence interval      | 0.004  | 0.001  | 0.026  | 0.001  | 0.014  | 0.003  | 0.007  | 0.011  | 0.022  | 0.029  | 0.044  | 0.035  | 0.020  | 0.017  | 0.021  |
|                           | $\mu^*$ confidence interval STDE | 0.003  | 0.001  | 0.004  | 0.000  | 0.002  | 0.003  | 0.002  | 0.002  | 0.005  | 0.006  | 0.004  | 0.007  | 0.005  | 0.002  | 0.003  |
|                           | $\sigma$                         | 0.030  | 0.139  | 0.138  | 0.004  | 0.054  | 0.022  | 0.057  | 0.085  | 0.171  | 0.277  | 0.271  | 0.270  | 0.155  | 0.133  | 0.172  |
|                           | $\sigma$ STDE                    | 0.026  | 0.116  | 0.063  | 0.004  | 0.064  | 0.023  | 0.006  | 0.010  | 0.017  | 0.059  | 0.059  | 0.021  | 0.015  | 0.003  | 0.025  |



Figure S1 presents the ratio of  $\mu^*$  confidence interval to  $\mu^*$  values. Note that the least influential parameters to the right of the graph show higher ratio of  $\mu^*$  confidence interval to  $\mu^*$ . The RBF method for missing data imputation performed better than the other method tested.

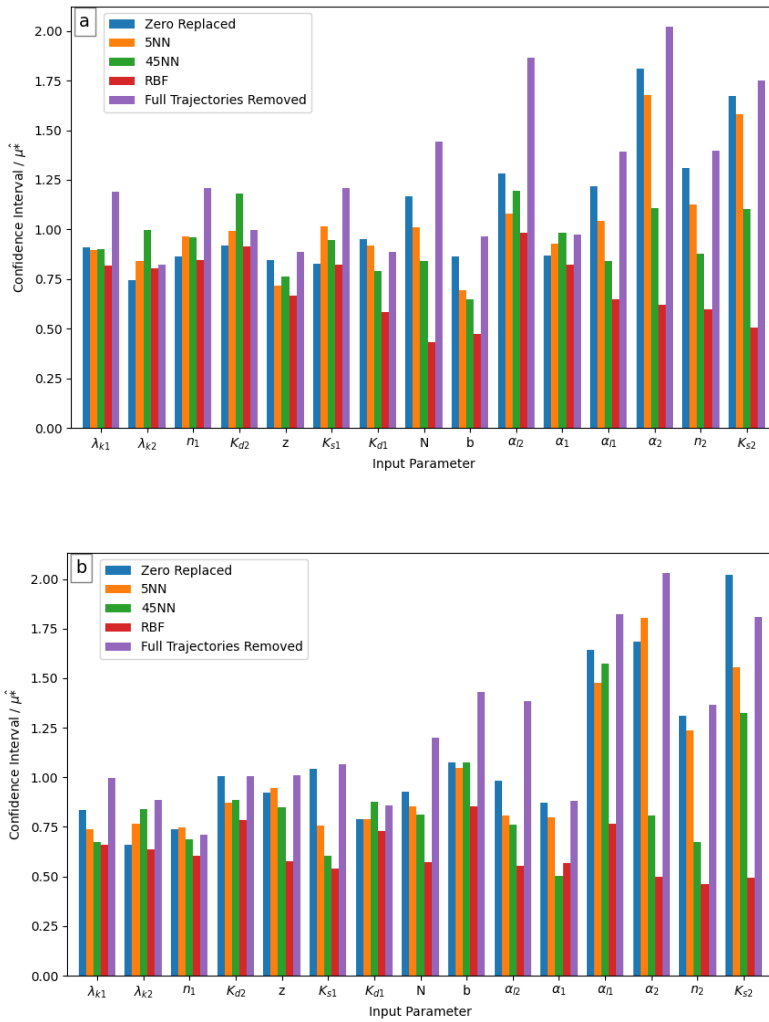

Figure S1 – Morris analysis results for heterogeneous media of the confidence interval to  $\mu^*$  ratio for: a. benzene flux to the aquifer; and b. final benzene concentration in the aquifer.

## References

- Archer, G. E. B., Saltelli, A., & Sobol, I. M. (1997). Sensitivity measures ANOVA-like techniques and the use of bootstrap. *Journal of Statistical Computation and Simulation*, 58(2), 99–120. <https://doi.org/10.1080/00949659708811825>
- Baek, D. S., Kim, S. B., & Kim, D. J. (2003). Irreversible sorption of benzene in sandy aquifer materials. *Hydrological Processes*, 17(6), 1239–1251. <https://doi.org/10.1002/hyp.1181>
- Bear, J. (1972). *Dynamics of Fluids in Porous Media*. Dover Publications.
- Berlin, M., Vasudevan, M., Kumar, G. S., & Nambi, I. M. (2016). Numerical modelling on fate and transport of coupled adsorption and biodegradation of pesticides in an unsaturated porous medium. *ISH Journal of Hydraulic Engineering*, 22(3), 236–246. <https://doi.org/10.1080/09715010.2016.1166073>
- Brunetti, G., Šimůnek, J., & Piro, P. (2016). A comprehensive numerical analysis of the hydraulic behavior of a permeable pavement. *Journal of Hydrology*, 540, 1146–1161. <https://doi.org/10.1016/j.jhydrol.2016.07.030>
- Carsel, R. F., & Parrish, R. S. (1988). Developing joint probability distributions of soil waterretention characteristics. *Water Resources Research*, 24, 755–769. <https://doi.org/10.1029/88WR01772>
- DeVaull, G. E., Ettinger R. A., Salanitro J. P., & B., G. J. (1997). Degradation in vadose zone soils during vapor transport: first-order rate constants. *Petroleum Hydrocarbons and Organic Chemicals in Ground Water -- Prevention, Detection, and Remediation Conference*.
- Donahue, R. B., Barbour, S. L., & Headley, J. V. (1999). Diffusion and adsorption of benzene in Regina clay. *Canadian Geotechnical Journal*, 36(3), 430–442. <https://doi.org/10.1139/cgj-36-3-430>
- Du, P., Sagehashi, M., Terada, A., & Hosomi, M. (2010). Numerical modeling of benzene transport in andosol and sand: Adequacy of diffusion and equilibrium adsorption equations. *World Academy of Science, Engineering and Technology*, 66(6), 38–42. <https://doi.org/10.5281/zenodo.1330975>
- Efron, B., & Tibshirani, R. (1986). Bootstrap methods for standard errors, confidence intervals, and other measures of statistical accuracy. *Statistical Science*, 1(1), 54–75.
- English, C. W., & Loehr, R. C. (1991). Degradation of organic vapors in unsaturated soils. *Journal of Hazardous Materials*, 28(1–2), 55–64. [https://doi.org/10.1016/0304-3894\(91\)87005-M](https://doi.org/10.1016/0304-3894(91)87005-M)
- Hartmann, A., Šimůnek, J., Aidoo, M. K., Seidel, S. J., & Lazarovitch, N. (2018). Implementation and Application of a Root Growth Module in HYDRUS. *Vadose Zone Journal*, 17(1), 170040. <https://doi.org/10.2136/vzj2017.02.0040>
- Hers, I., Atwater, J., Li, L., & Zapf-Gilje, R. (2000). Evaluation of vadose zone biodegradation of BTX vapours. *Journal of Contaminant Hydrology*, 46(3–4), 233–264. [https://doi.org/10.1016/S0169-7722\(00\)00135-2](https://doi.org/10.1016/S0169-7722(00)00135-2)
- Karickhoff, S. W. (1981). Semi-empirical estimation of sorption of hydrophobic pollutants on

natural sediments and soils. *Chemosphere*, 10(1), 833–846.

- Kenaga, E. E. (1980). Predicted bioconcentration factors and soil sorption coefficients of pesticides and other chemicals. *Ecotoxicology and Environmental Safety*, 4(1), 26–38. [https://doi.org/10.1016/0147-6513\(80\)90005-6](https://doi.org/10.1016/0147-6513(80)90005-6)
- Lahvis, M. A., Baehr, A. L., & Baker, R. J. (1999). Quantification of aerobic biodegradation and volatilization rates of gasoline hydrocarbons near the water table under natural attenuation conditions. *Water Resources Research*, 35(3), 753–765. <https://doi.org/10.1029/1998WR900087>
- Mackay, A. A., Chin, Y. P., Macfarlane, J. K., & Gschwend, P. M. (1996). Laboratory assessment of BTEX soil flushing. *Environmental Science and Technology*, 30(11), 3223–3231. <https://doi.org/10.1021/es950963b>
- Osagie, E., & Owabor, C. N. (2015). Adsorption of benzene in batch system in natural clay and sandy soil. *Advances in Chemical Engineering and Science*, 05(03), 352–361. <https://doi.org/10.4236/aces.2015.53037>
- Plischke, E., Borgonovo, E., & Smith, C. L. (2013). Global sensitivity measures from given data. *European Journal of Operational Research*, 226(3), 536–550. <https://doi.org/10.1016/j.ejor.2012.11.047>
- Redding, A. Z., Burns, S. E., Upson, R. T., & Anderson, E. F. (2002). Organoclay sorption of benzene as a function of total organic carbon content. *Journal of Colloid and Interface Science*, 250(1), 261–264. <https://doi.org/10.1006/jcis.2001.8205>
- Ririe, T., & Sweeney, R. (1995). Fate and transport of volatile hydrocarbons in the vadose zone. *1995 Petroleum Hydrocarbon and Organic Chemicals in Groundwater*, 529–542.
- Saltelli, A., Tarantola, S., Campolongo, F., & Ratto, M. (2004). *Sensitivity analysis in practice: a guide to assessing scientific models (Google eBook)*. <http://books.google.com/books?id=NsAVmohPNpQC&pgis=1>
- Schaap, M. G., Leij, F. J., & Van Genuchten, M. T. (2001). Rosetta: A computer program for estimating soil hydraulic parameters with hierarchical pedotransfer functions. *Journal of Hydrology*, 251(3–4), 163–176. [https://doi.org/10.1016/S0022-1694\(01\)00466-8](https://doi.org/10.1016/S0022-1694(01)00466-8)
- Wiedemeier, T. H., Swanson, M. A., Wilson, J. T., Campbell, D. H., Miller, R. N., & Hansen, J. E. (1996). Approximation of biodegradation rate constants for monoaromatic hydrocarbons (BTEX) in ground water. *Ground Water Monitoring and Remediation*, 16(3), 186–194. <https://doi.org/10.1111/j.1745-6592.1996.tb00149.x>
